# Supplementary material
Source: MDPI journal article supplement (https://www.mdpi.com/2311-5629/10/2/47)
Supplement: s1 [file s1]

## SUPPORTING INFORMATION

# Insights into the electrocatalytic activity of Fe,N-glucose/carbon nanotube hybrids for the oxygen reduction reaction

Rafael G. Morais<sup>1,2,\*</sup>, Natalia Rey-Raap<sup>3</sup>, José L. Figueiredo<sup>1,2</sup>, Manuel F. R. Pereira<sup>1,2,\*</sup>

<sup>1</sup> LSRE-LCM — Laboratory of Separation and Reaction Engineering – Laboratory of Catalysis and Materials, Faculty of Engineering, University of Porto, Rua Dr. Roberto Frias, 4200-465 Porto, Portugal; jlfig@fe.up.pt

<sup>2</sup> ALiCE — Associate Laboratory in Chemical Engineering, Faculty of Engineering, University of Porto, Rua Dr. Roberto Frias, 4200-465 Porto, Portugal

<sup>3</sup> Instituto de Ciencia y Tecnología del Carbono, INCAR-CSIC, Francisco Pintado Fe 26, 33011, Oviedo, Spain; natalia.rey@incar.csic.es

\*Correspondence: rgm@fe.up.pt (R.G.M), fpereira@fe.up.pt (M.F.R.P.)

**Abstract:** Glucose-derived carbon hybrids were synthesized by hydrothermal treatment in the presence of oxidized carbon nanotubes. Additionally, iron and nitrogen functionalities were incorporated into the carbon structure using different methodologies. The introduction of iron and nitrogen in a single step under a H<sub>2</sub> atmosphere favored the formation of quaternary nitrogen and oxidized nitrogen, whereas the incorporation of nitrogen under an N<sub>2</sub> atmosphere after doping the hybrids with iron mainly produced pyridinic nitrogen. The samples were characterized by scanning electron microscopy, X-ray spectroscopy, adsorption isotherms, inductively coupled plasma optical emission spectrometry, and Raman spectroscopy. The presence of iron and nitrogen in the carbons increases the onset potential toward oxygen reduction in KOH 0.1 mol L<sup>-1</sup> by 130 mV (0.83 V), in comparison to carbonized glucose, whereas the reaction mechanism shifts closer to a direct pathway and the formation of HO<sub>2</sub><sup>-</sup> decreases to 25% (3.5 electrons). The reaction rate also increased in comparison to the carbonized glucose, as observed by the decrease in the Tafel slope value from 117 to 61 mV dec<sup>-1</sup>. Furthermore, the incorporation of iron and nitrogen in a single step enhanced the short-term performance of the prepared electrocatalysts, which may also be due to the higher relative amount of quaternary nitrogen.

**Keywords:** Carbon-based electrocatalyst; Carbon Nanotubes; Oxygen Reduction Reaction; Nitrogen-doping; Iron.

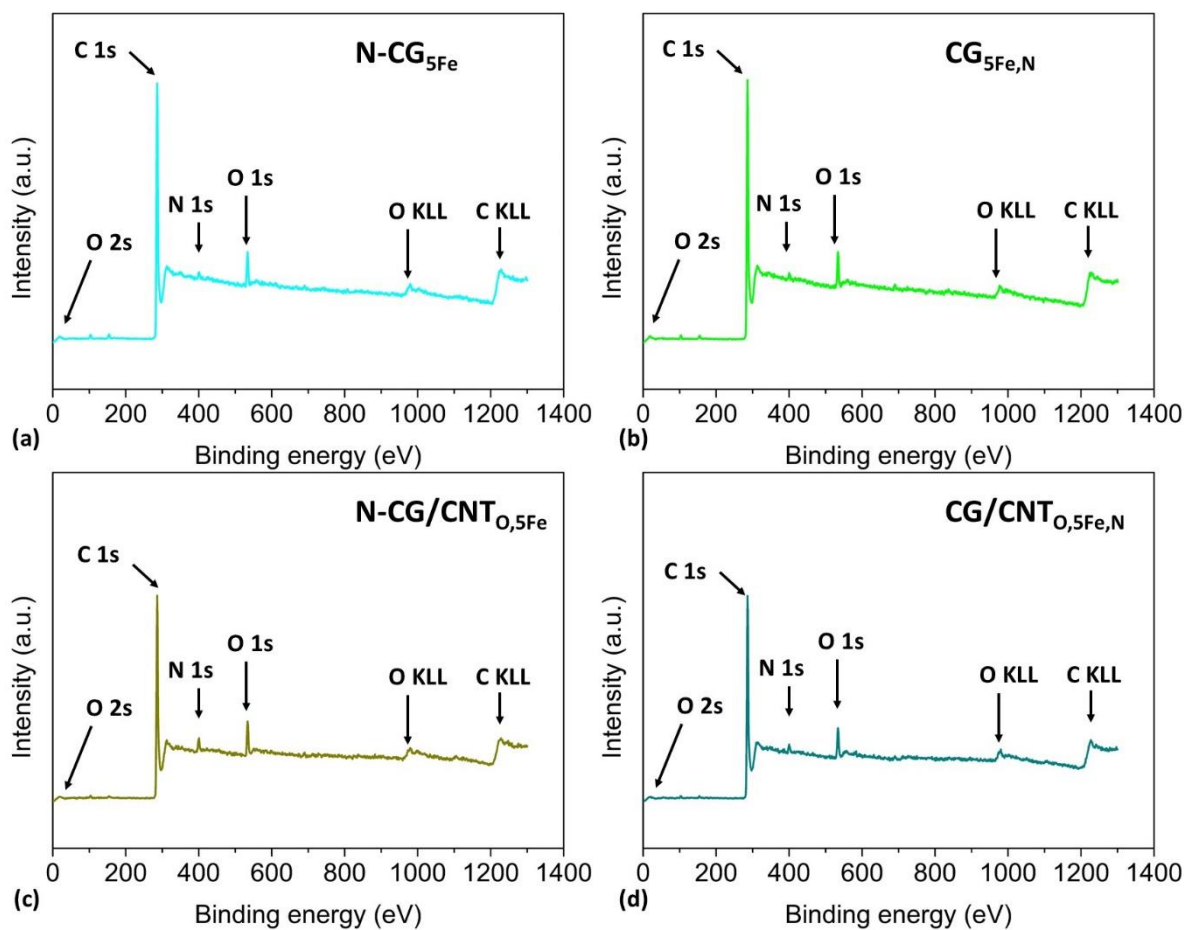

**Figure S1.** XPS survey spectra of the prepared Fe,N CG (a,b) and Fe,N CG/CNT hybrids (c,d) electrocatalysts, in which N-CG<sub>5Fe</sub> and N-CG/CNT<sub>0.5Fe</sub> were prepared using a two-step method and CG<sub>5Fe,N</sub> and CG/CNT<sub>0.5Fe,N</sub> were prepared using a one-step method.

**Table S1.** Surface chemical composition determined by XPS.

| Sample                    | C (wt.%) | O (wt.%) | N (wt.%) |
|---------------------------|----------|----------|----------|
| N-CG <sub>5Fe</sub>       | 91.0     | 6.2      | 2.8      |
| N-CG/CNT <sub>0.5Fe</sub> | 87.5     | 7.8      | 4.7      |
| CG <sub>5Fe,N</sub>       | 91.4     | 6.6      | 2.0      |
| CG/CNT <sub>0.5Fe,N</sub> | 89.8     | 7.5      | 2.7      |

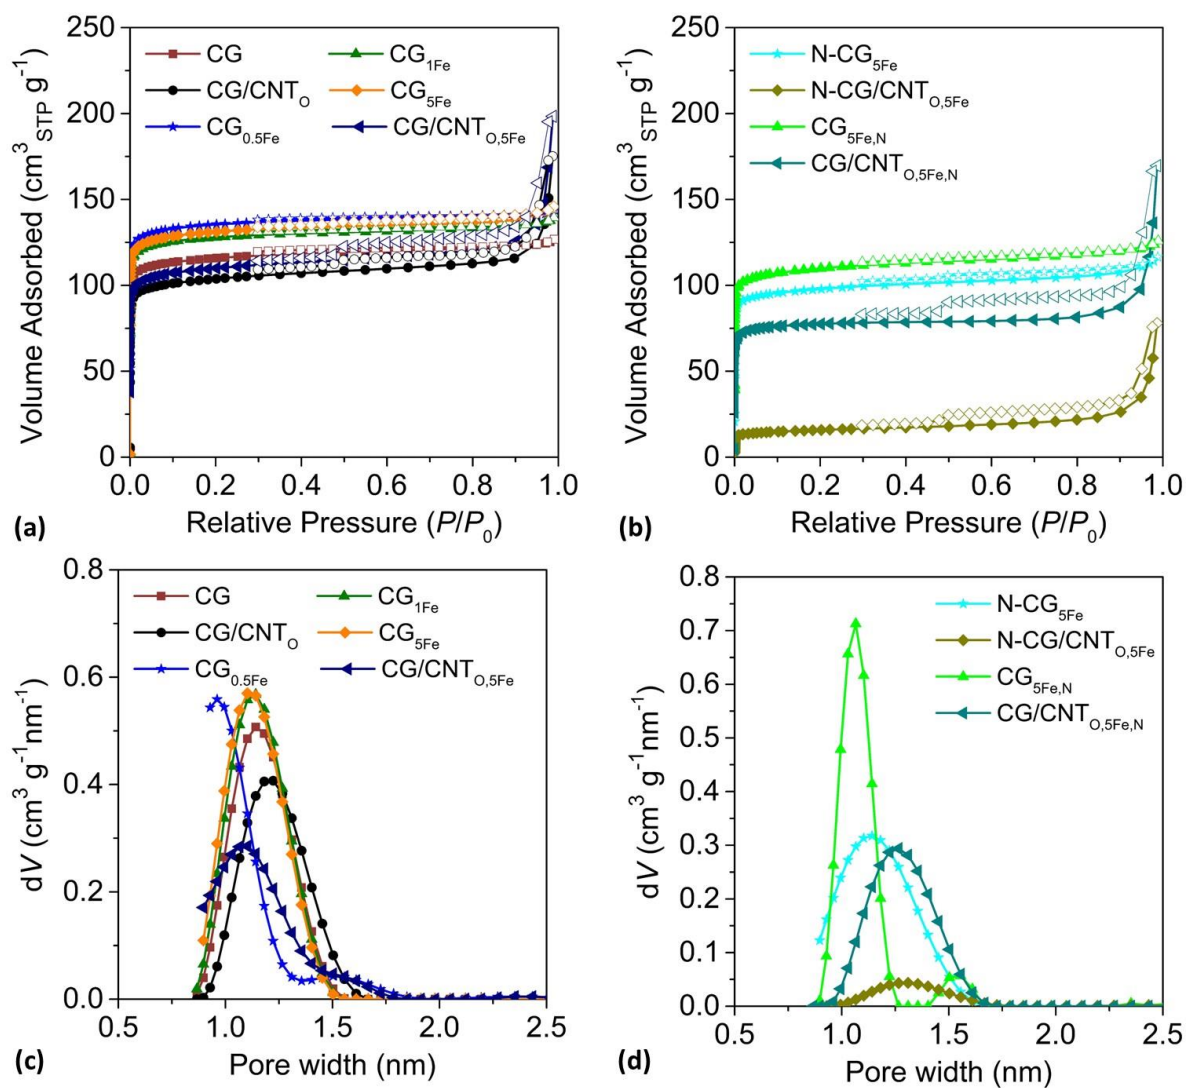

**Figure S2.**  $N_2$  adsorption-desorption isotherms at  $-196^\circ C$  and pore size distribution of undoped,  $CG_{xFe}$  and  $CG/CNT_{O,5Fe}$  (a,c), and  $N-CG_{5Fe}$ ,  $N-CG/CNT_{O,5Fe}$ ,  $CG_{5Fe,N}$  and  $CG/CNT_{O,5Fe,N}$  (b,d) electrocatalysts.

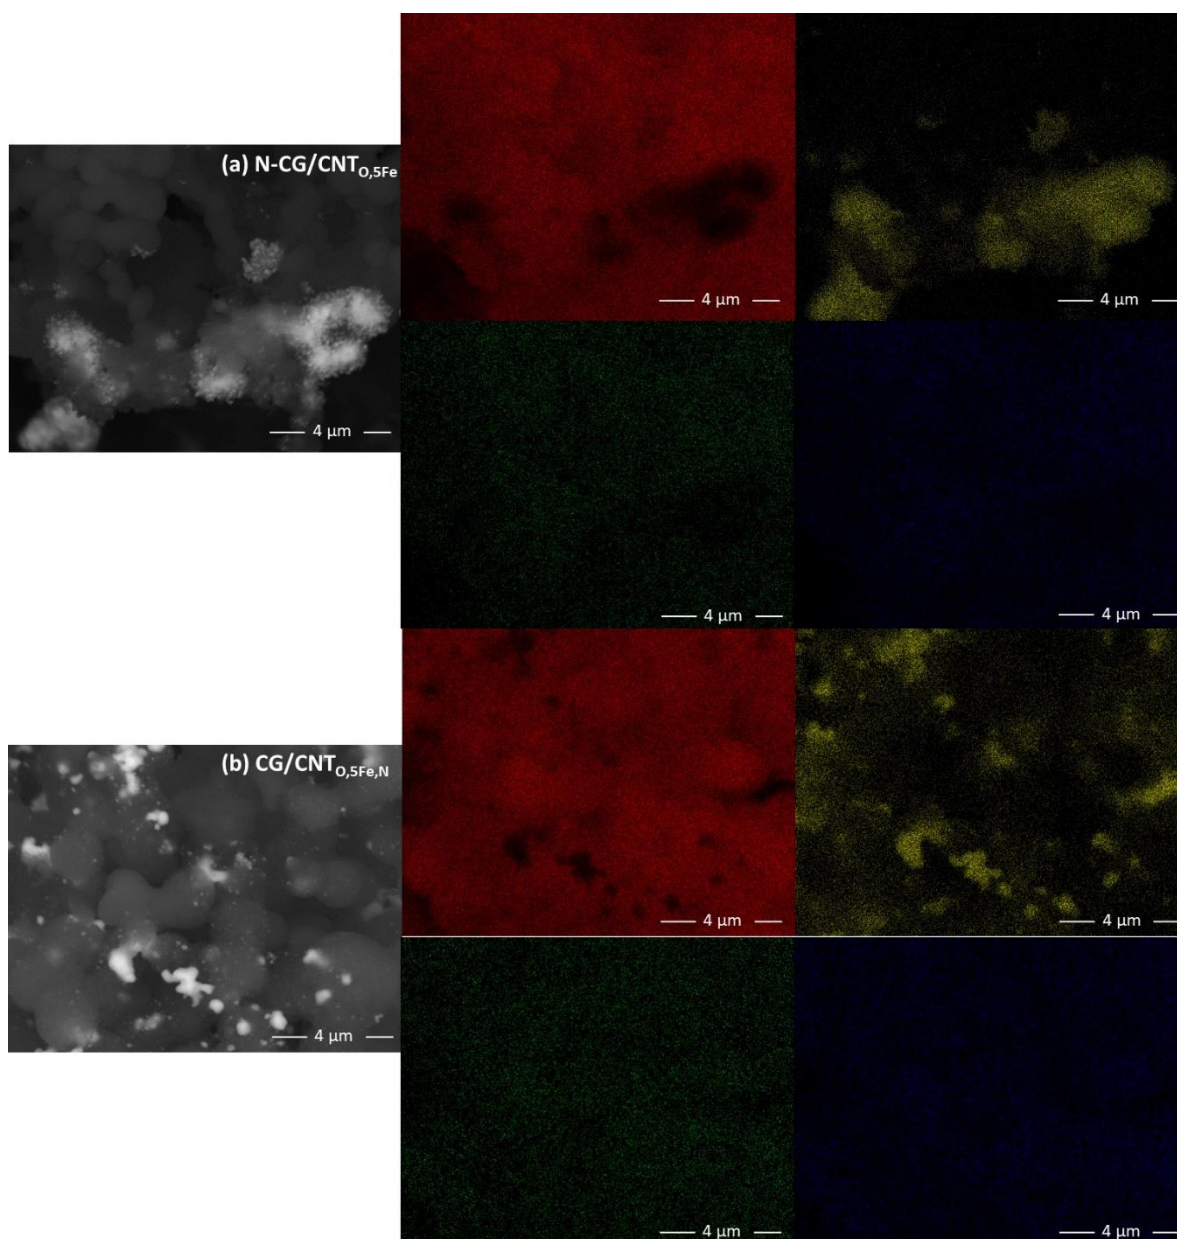

**Figure S3.** Elemental mapping of N-CG/CNT<sub>0.5Fe</sub> (a) and CG/CNT<sub>0.5Fe,N</sub> (b). Red – Carbon, Yellow – Iron, Green – Nitrogen, Blue - Oxygen.

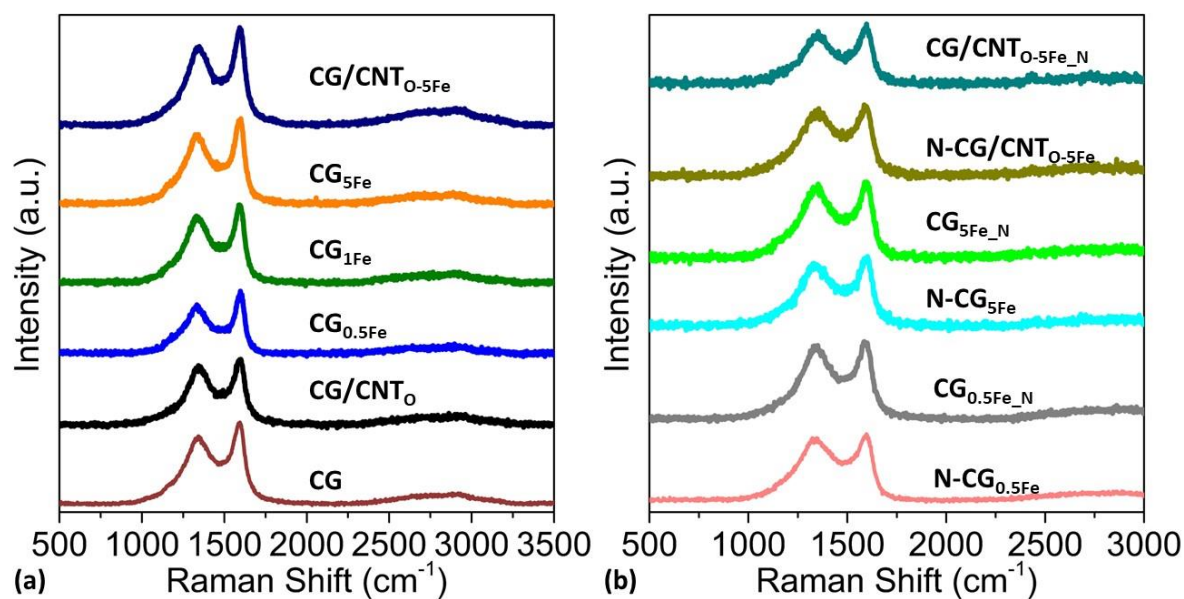

**Figure S4.** Raman spectra of undoped and monometallic electrocatalysts (a), and Fe,N electrocatalysts (b).

**Table S2.** Ratio of the integrated D and G peaks obtained by Raman spectroscopy.

| Sample                    | $A_D/A_G$ |
|---------------------------|-----------|
| CG                        | 2.44      |
| CG/CNT <sub>0</sub>       | 2.22      |
| CG <sub>0.5Fe</sub>       | 2.48      |
| CG <sub>1Fe</sub>         | 2.44      |
| CG <sub>5Fe</sub>         | 2.41      |
| CG/CNT <sub>0.5Fe</sub>   | 2.57      |
| N-CG <sub>5Fe</sub>       | 2.36      |
| N-CG/CNT <sub>0.5Fe</sub> | 2.66      |
| CG <sub>5Fe,N</sub>       | 2.93      |
| CG/CNT <sub>0.5Fe,N</sub> | 2.35      |



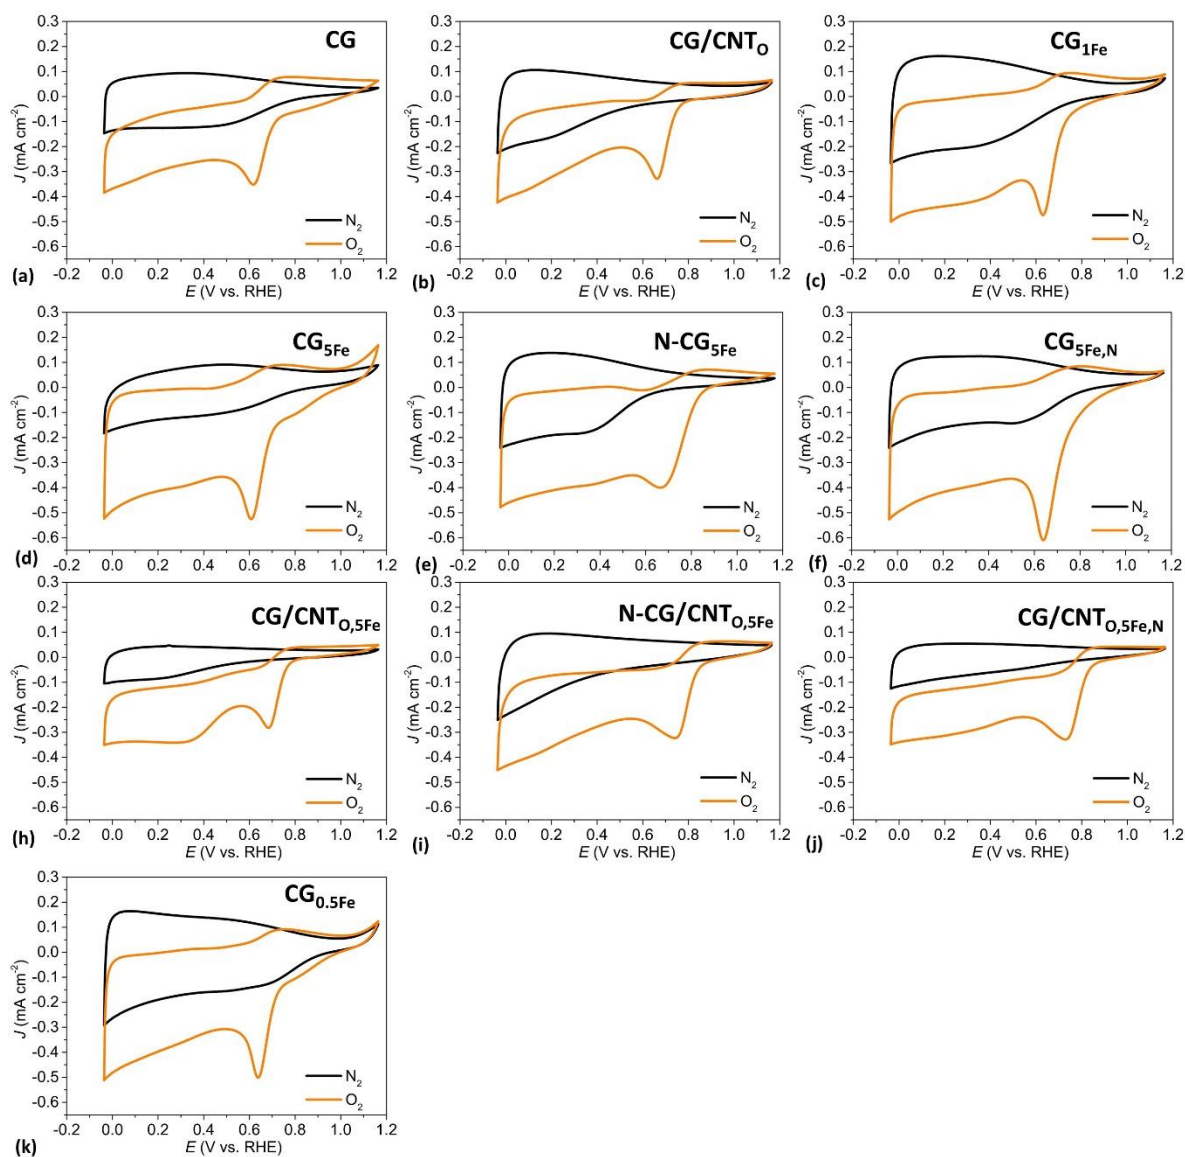

**Figure S5.** Cyclic voltammograms recorded at  $5 \text{ mV s}^{-1}$  in  $\text{N}_2$ - and  $\text{O}_2$ -saturated  $0.1 \text{ mol L}^{-1} \text{ KOH}$  electrolyte from  $1.15 \text{ V}$  to  $-0.05 \text{ V}$ .

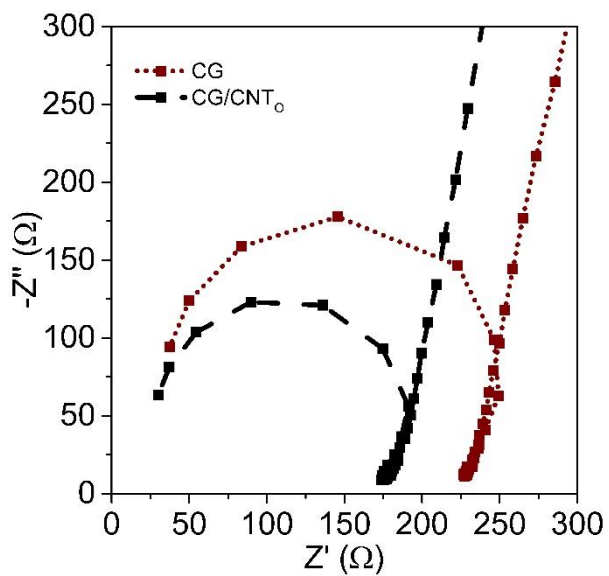

**Figure S6.** Nyquist plots for CG and CG/CNT<sub>0</sub> obtained by electrochemical impedance spectroscopy at 0 V.

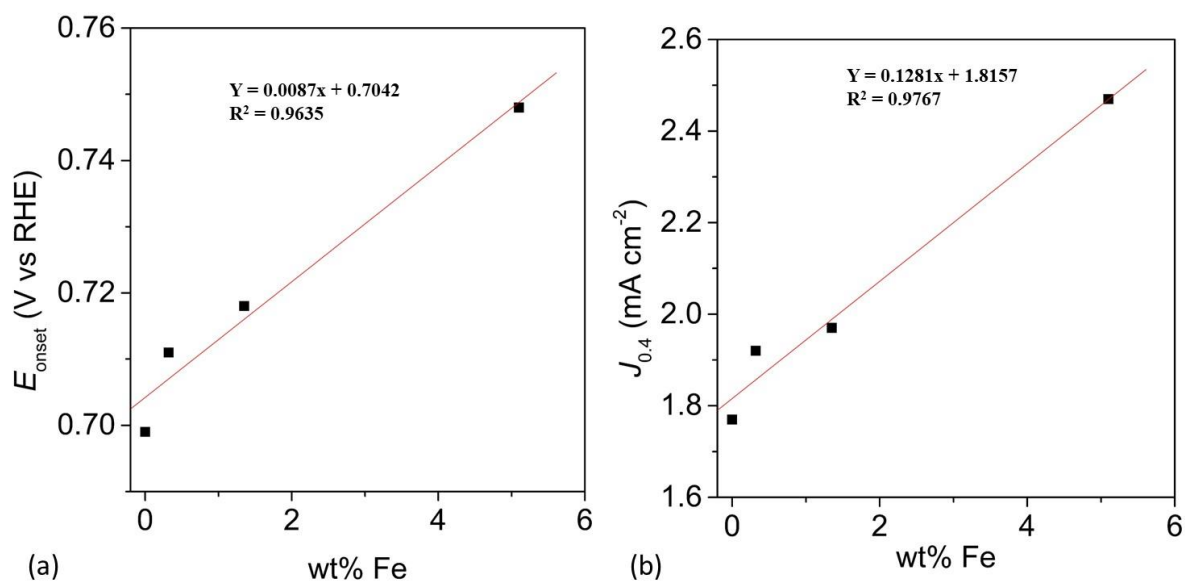

**Figure S7.** Onset potential (a) and current density at a potential of 0.4 V (b) obtained from the linear sweep voltammetry curves of Fig. 5a (a) for the CG<sub>x</sub>Fe samples versus the percentage of Fe calculated by ICP.

**Table S3.** ORR parameters of glucose-derived carbons, reagents and synthesis methods employed.

| Reagents/Samples                                                                                                                                    | Synthesis Methods                                    | $E_{\text{onset}}$<br>(V) | $J_L$<br>(mA cm <sup>-2</sup> ) <sup>a</sup> | $n_e^a$ | Tafel Slope<br>(mV dec <sup>-1</sup> ) | Ref.      |
|-----------------------------------------------------------------------------------------------------------------------------------------------------|------------------------------------------------------|---------------------------|----------------------------------------------|---------|----------------------------------------|-----------|
| N-CG <sub>5Fe</sub>                                                                                                                                 | Hydrothermal<br>Polymerization/<br>Thermal treatment | 0.81                      | 3.4                                          | 3.3     | 52                                     | This work |
| N-CG/CNT <sub>O, 5Fe</sub>                                                                                                                          |                                                      | 0.83                      | 3.6                                          | 3.3     | 63                                     |           |
| CG <sub>5Fe, N</sub>                                                                                                                                |                                                      | 0.79                      | 3.7                                          | 3.5     | 62                                     |           |
| CG/CNT <sub>O, 5Fe, N</sub>                                                                                                                         |                                                      | 0.81                      | 3.9                                          | 3.5     | 61                                     |           |
| Glucose + dicyandiamide                                                                                                                             | Activation with ZnCl <sub>2</sub>                    | 0.92                      | 3.0                                          | 3.5-3.9 | 50-58                                  | [1]       |
| Glucose, melamine, cyanuric acid, dimethyl sulphoxide                                                                                               | Thermal treatment                                    | 0.90                      | 4.1                                          | 2.5-3.5 | -                                      | [2]       |
| Glucose, SBA-15, pluoronic P123, HCl, tetraethyl orthosilicate, H <sub>2</sub> SO <sub>4</sub> , HF, Thiophene, FeCl <sub>3</sub> , NH <sub>3</sub> | Thermal treatment                                    | 0.92                      | 5.5                                          | 4.0     | 68                                     | [3]       |
| Glucose, urea, CNT                                                                                                                                  | Thermal treatment                                    | 0.95                      | 4.7                                          | 3.9     | 79                                     | [4]       |
| Glucose, thiourea, NaOH, HCl, iron nitrate, urea, sulfur                                                                                            | Thermal treatment, leaching                          | 0.97                      | 5.5                                          | 4.0     | 50-53                                  | [5]       |
| Glucose, dicyandiamide                                                                                                                              | Thermal treatment                                    | 0.95                      | 5.7                                          | 3.9     | -                                      | [6]       |
| Glucose, Cu <sub>2</sub> O, melamine, SiO <sub>2</sub> , HNO <sub>3</sub>                                                                           | Thermal treatment                                    | 0.89                      | 4.9                                          | 4.0     | -                                      | [7]       |
| Glucose, Fe(ClO <sub>4</sub> ) <sub>2</sub> ·xH <sub>2</sub> O, ascorbic acid, NH <sub>4</sub> COOH, HCOOH, melamine, HCl, methanol                 | Stirring, thermal treatment                          | 0.92                      | 5.0                                          | 3.6     | 57                                     | [8]       |
| Glucose, urea, Mg <sub>5</sub> (OH) <sub>2</sub> (CO <sub>3</sub> ) <sub>4</sub> , ZnCl <sub>2</sub> , HCl                                          | Thermal treatment                                    | 0.94                      | 5.7                                          | 3.2-4.0 | 52                                     | [9]       |
| Glucose, zinc nitrate, benzimidazole, DMF                                                                                                           | Thermal treatment                                    | 0.74-0.86                 | 2.5-4.6                                      | 2.3-3.7 | -                                      | [10]      |
| Glucose, C <sub>24</sub> H <sub>20</sub> P(Br), CH <sub>3</sub> (CH <sub>2</sub> ) <sub>11</sub> OSO <sub>3</sub> Na,                               | Hydrothermal treatment/<br>Carbonization             | 0.73-0.88                 | 4.0-5.6                                      | 3.0-3.8 | -                                      | [11]      |

<sup>a</sup>- Measured at the last LSV point

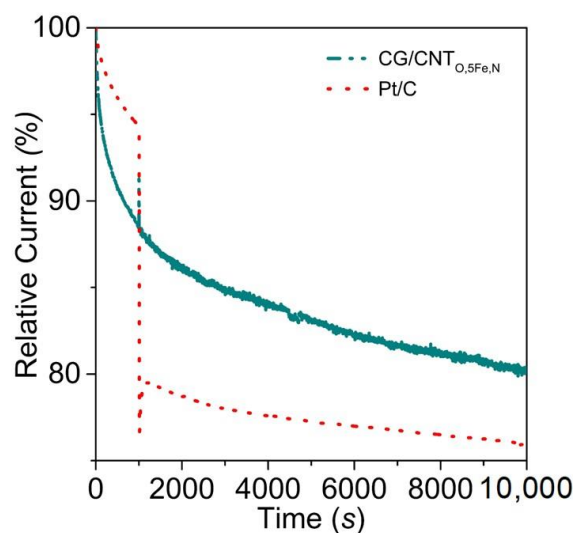

**Figure S8.** Methanol tolerance of CG/CNT<sub>O,5Fe,N</sub> and Pt/C at 0.4 V during 10,000 s.



## References

- [1] X. Liu, L. Li, W. Zhou, Y. Zhou, W. Niu, S. Chen, High-Performance Electrocatalysts for Oxygen Reduction Based on Nitrogen-Doped Porous Carbon from Hydrothermal Treatment of Glucose and Dicyandiamide, *ChemElectroChem*, 2 (2015) 803-810.
- [2] X. Fu, X. Hu, Z. Yan, K. Lei, F. Li, F. Cheng, J. Chen, Template-free synthesis of porous graphitic carbon nitride/carbon composite spheres for electrocatalytic oxygen reduction reaction, *Chem. Commun.*, 52 (2016) 1725-1728.
- [3] Y. Qiu, J. Huo, F. Jia, B.H. Shanks, W. Li, N- and S-doped mesoporous carbon as metal-free cathode catalysts for direct biorenewable alcohol fuel cells, *J. Mater. Chem. A*, 4 (2016) 83-95.
- [4] X. Li, Y. Fang, S. Zhao, J. Wu, F. Li, M. Tian, X. Long, J. Jin, J. Ma, Nitrogen-doped mesoporous carbon nanosheet/carbon nanotube hybrids as metal-free bi-functional electrocatalysts for water oxidation and oxygen reduction, *J. Mater. Chem. A*, 4 (2016) 13133-13141.
- [5] I. Kone, A. Xie, Y. Tang, Y. Chen, J. Liu, Y. Chen, Y. Sun, X. Yang, P. Wan, Hierarchical Porous Carbon Doped with Iron/Nitrogen/Sulfur for Efficient Oxygen Reduction Reaction, *ACS Appl. Mater. Interfaces*, 9 (2017) 20963-20973.
- [6] Q. Li, D. Xu, X. Ou, F. Yan, Nitrogen-Doped Graphitic Porous Carbon Nanosheets Derived from In Situ Formed g-C<sub>3</sub>N<sub>4</sub> Templates for the Oxygen Reduction Reaction, *Chemistry – An Asian Journal*, 12 (2017) 1816-1823.
- [7] W. Wei, H. Ge, L. Huang, M. Kuang, A.M. Al-Enizi, L. Zhang, G. Zheng, Hierarchically tubular nitrogen-doped carbon structures for the oxygen reduction reaction, *J. Mater. Chem. A*, 5 (2017) 13634-13638.
- [8] L. Zhang, C. Qi, A. Zhao, G. Xu, J. Xu, L. Zhang, C. Zhang, D. Jia, N-doped porous carbon-encapsulated Fe nanoparticles as efficient electrocatalysts for oxygen reduction reaction, *Appl. Surf. Sci.*, 445 (2018) 462-470.
- [9] X. Li, B.Y. Guan, S. Gao, X.W. Lou, A general dual-templating approach to biomass-derived hierarchically porous heteroatom-doped carbon materials for enhanced electrocatalytic oxygen reduction, *Energy Environ. Sci.*, 12 (2019) 648-655.
- [10] P. Zhang, F. Sun, Z. Xiang, Z. Shen, J. Yun, D. Cao, ZIF-derived in situ nitrogen-doped porous carbons as efficient metal-free electrocatalysts for oxygen reduction reaction, *Energy Environ. Sci.*, 7 (2014) 442-450.
- [11] J. Wu, C. Jin, Z. Yang, J. Tian, R. Yang, Synthesis of phosphorus-doped carbon hollow spheres as efficient metal-free electrocatalysts for oxygen reduction, *Carbon*, 82 (2015) 562-571.
